# Supplementary material
Source: PubMed Central journal article supplement (PMC4391770)
Supplement: supp_the2014-0424_Nechushtan-14-424.pdf [file supp_the2014-0424_Nechushtan-14-424.pdf]

## Overview

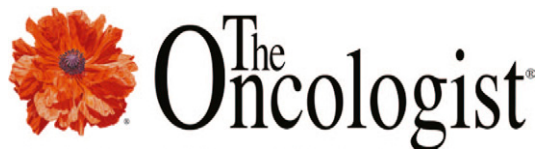

The official journal of the Society for Translational Oncology

**First Published Online March 16, 2015**

**DOI:** 10.1634/theoncologist.2014-0424

**Title:** A Phase IIb Trial Assessing the Addition of Disulfiram to Chemotherapy for the Treatment of Metastatic Non-Small Cell Lung Cancer

**Authors:** Hovav Nechushtan,<sup>a</sup> Yousef Hamamreh,<sup>b</sup> Salim Nidal,<sup>b</sup> Maya Gotfried,<sup>c</sup> Amichai Baron,<sup>d</sup> Yossi Israeli Shalev,<sup>d</sup> Benjamin Nisman,<sup>a</sup> Tamar Peretz,<sup>a</sup> Nili Peylan-Ramu<sup>a</sup>

<sup>a</sup>Hadassah Hebrew University Medical Center, Jerusalem, Israel; <sup>b</sup>Augusta Victoria Cancer Center, Jerusalem, Israel; <sup>c</sup>Meir Medical Center, Kfar Saba, Israel; <sup>d</sup>Ora Bio Ltd., Nazareth, Israel

**ClinicalTrials.gov Identifier:** NCT00312819

**Sponsor(s):** Ora Bio Ltd.

**Principal Investigators:** Hovav Nechushtan, Yousef Hamamreh, Salim Nidal, Nili Peylan-Ramu

**IRB Approved:** Yes

### Disclosures

**Amichai Baron:** Ora Bio Ltd. (RF, E). The other authors indicated no financial relationships.

(C/A) Consulting/advisory relationship; (RF) Research funding; (E) Employment; (ET) Expert testimony; (H) Honoraria received; (OI) Ownership interests; (IP) Intellectual property rights/inventor/patent holder; (SAB) Scientific advisory board

## Author Summary: Abstract and Brief Discussion

### Background

Disulfiram, an alcohol aversion agent, has been in use for >50 years. Numerous authors have reported an anticancer effect of this drug in vitro and in mouse models. More recently, several reports have claimed that disulfiram also possesses anti-stem cell activity. We set out to obtain initial data regarding the safety of combining this drug with chemotherapy and the possible effectiveness of disulfiram in a combination regimen in non-small cell lung cancer (NSCLC).

### Methods

This phase II, multicenter, randomized, double-blinded study assessed the safety and efficacy of adding of disulfiram to cisplatin and vinorelbine for six cycles. Newly diagnosed NSCLC patients were recruited. Patients with either stage IV or what was considered at the time “wet IIIb” (since 2009, these patients have been considered stage IV) were recruited. The patients were treated with only chemotherapy, and none were treated with either surgery or chemoradiation. Disulfiram was administered at a dose of 40 mg three times daily.

### Results

Forty patients were treated for more than two cycles, half with and half without disulfiram, which was well tolerated. An increase in survival was noted for the experimental group (10 vs. 7.1 months). Interestingly, there were only two long-term survivors, both in the disulfiram group.

### Conclusion

The addition of disulfiram to a combination regimen of cisplatin and vinorelbine was well tolerated and appeared to prolong survival in patients with newly diagnosed non-small cell lung cancer. The results from this small study seem encouraging

enough for assessment in larger trials. Disulfiram is an inexpensive and safe drug; if its addition to chemotherapy could be shown to prolong survival, an effective regimen could be established and used widely, even in resource-poor countries.

## Discussion

Given preclinical data suggesting antitumor activity and its established safety, there is interest in the use of disulfiram as an anticancer drug [1, 2]. To our knowledge, this randomized trial is the first using disulfiram as an additional anticancer treatment in lung cancer. Although its precise mechanisms of action have yet to be established, preclinical studies have suggested that disulfiram possesses antiangiogenic activity and can inhibit the activity of ATP-binding cassette transporters [3]. Additional activity of disulfiram has been suggested recently: inhibition of cancer stem cells. The latter is thought to be a consequence of disulfiram's inhibitory effect on aldehyde dehydrogenase, an enzyme that is highly expressed in what many believe are cancer stem cells [4]. Kim et al. recently demonstrated that the use of disulfiram can induce apoptosis in pancreatic cancer stem cells expressing high levels of aldehyde dehydrogenase [5]. This finding suggests that disulfiram's anti-cancer stem cell activity may be of great importance, especially in tumors that have an initial response to the therapy.

In this paper, we described a phase II trial of a regimen using cisplatin plus vinorelbine with or without disulfiram in lung cancer. Disulfiram was continued after cessation of chemotherapy after six cycles. Analysis was performed on the 40 patients who continued treatment beyond the first two cycles. The higher response rate (46% vs. 37%) in the disulfiram group was not statistically different. Quality of life was similar between the groups; however, it is noteworthy that both progression-free and overall survival curves separate, and because of the long-term response of a few patients in the active group, there is a statistically significant progression-free and overall survival advantage for the active group (Fig. 1).

The unusual result is the long-term survival of two patients in the active group, an event that is extremely rare in patients with stage IV lung cancer treated by chemotherapy alone. It is important to note that the difference in survival continued after cessation of chemotherapy and maintenance with disulfiram alone.

The drug is inexpensive, and its tolerability and safety have been demonstrated over years of clinical experience with a large number of patients. Our results support a larger phase III trial combining this drug with chemotherapy.

## Trial Information

|                                                        |                                                                                                                                                                                                                                                                                                                                                                                                                                                                                                                  |
|--------------------------------------------------------|------------------------------------------------------------------------------------------------------------------------------------------------------------------------------------------------------------------------------------------------------------------------------------------------------------------------------------------------------------------------------------------------------------------------------------------------------------------------------------------------------------------|
| <b>Disease</b>                                         | Lung cancer – NSCLC                                                                                                                                                                                                                                                                                                                                                                                                                                                                                              |
| <b>Stage of disease / treatment</b>                    | Metastatic / Advanced                                                                                                                                                                                                                                                                                                                                                                                                                                                                                            |
| <b>Prior Therapy</b>                                   | None                                                                                                                                                                                                                                                                                                                                                                                                                                                                                                             |
| <b>Type of study - 1</b>                               | Phase II                                                                                                                                                                                                                                                                                                                                                                                                                                                                                                         |
| <b>Type of study - 2</b>                               | Randomized                                                                                                                                                                                                                                                                                                                                                                                                                                                                                                       |
| <b>PFS</b>                                             | P: 0.043, HR:                                                                                                                                                                                                                                                                                                                                                                                                                                                                                                    |
| <b>Primary Endpoint</b>                                | Progression-free survival                                                                                                                                                                                                                                                                                                                                                                                                                                                                                        |
| <b>Primary Endpoint</b>                                | Overall survival                                                                                                                                                                                                                                                                                                                                                                                                                                                                                                 |
| <b>Secondary Endpoint</b>                              | Tolerability                                                                                                                                                                                                                                                                                                                                                                                                                                                                                                     |
| <b>Additional Details of Endpoints or Study Design</b> | All patients of this double-blind trial had agreed to abstain from alcohol drinking. Tolerability was assessed by quality of life questionnaires and was similar in both groups, which abstained from alcohol. Fifty-three patients were initially recruited, but results are presented only for the 40 patients who continued following the first two cycles and were divided into two similar sized groups. Disease responded in 10 patients in the experimental group and in 7 patients in the control group. |
| <b>Investigator's Analysis</b>                         | Active and should be pursued further                                                                                                                                                                                                                                                                                                                                                                                                                                                                             |

## Drug Information

### Experimental Arm

|                             |            |
|-----------------------------|------------|
| <b>Drug 1</b>               |            |
| <b>Generic/Working name</b> | Disulfiram |
| <b>Trade name</b>           | Antabuse   |

|                                   |                                                                                                                                                                                                                                                                |
|-----------------------------------|----------------------------------------------------------------------------------------------------------------------------------------------------------------------------------------------------------------------------------------------------------------|
| <b>Company name</b>               | Ora Bio (just the preparation of the capsules)                                                                                                                                                                                                                 |
| <b>Drug type</b>                  | Small molecule                                                                                                                                                                                                                                                 |
| <b>Drug class</b>                 | Other                                                                                                                                                                                                                                                          |
| <b>Dose</b>                       | 40 × 3 day milligrams per flat dose                                                                                                                                                                                                                            |
| <b>Route</b>                      | Oral (po)                                                                                                                                                                                                                                                      |
| <b>Schedule of Administration</b> | Three times daily versus placebo.<br>Drug was compared with placebo and used even following cessation of therapy.<br>The drug was added to standard dose of cisplatin (75 mg/m <sup>2</sup> ) every 3 weeks and vinorelbine 25 mg/m <sup>2</sup> days 1 and 8. |
| <b>Drug 2</b>                     |                                                                                                                                                                                                                                                                |
| <b>Generic/Working name</b>       | Cisplatin                                                                                                                                                                                                                                                      |
| <b>Trade name</b>                 | Platinol                                                                                                                                                                                                                                                       |
| <b>Drug type</b>                  | Other                                                                                                                                                                                                                                                          |
| <b>Drug class</b>                 | Alkylating agent                                                                                                                                                                                                                                               |
| <b>Dose</b>                       | 75 mg per m <sup>2</sup>                                                                                                                                                                                                                                       |
| <b>Route</b>                      | IV                                                                                                                                                                                                                                                             |
| <b>Schedule of Administration</b> | Every 3 weeks                                                                                                                                                                                                                                                  |
| <b>Drug 3</b>                     |                                                                                                                                                                                                                                                                |
| <b>Generic/Working name</b>       | Vinorelbine                                                                                                                                                                                                                                                    |
| <b>Trade name</b>                 | Navelbine                                                                                                                                                                                                                                                      |
| <b>Drug class</b>                 | Other                                                                                                                                                                                                                                                          |
| <b>Dose</b>                       | 25 mg per m <sup>2</sup>                                                                                                                                                                                                                                       |
| <b>Route</b>                      | IV                                                                                                                                                                                                                                                             |
| <b>Schedule of Administration</b> | Days 1 and 8 every 3 weeks                                                                                                                                                                                                                                     |

## Patient Characteristics

|                                            |                                                            |                |                   |
|--------------------------------------------|------------------------------------------------------------|----------------|-------------------|
| <b>Number of patients, male</b>            | 40                                                         |                |                   |
| <b>Number of patients, female</b>          | 13                                                         |                |                   |
| <b>Stage</b>                               | 4                                                          |                |                   |
| <b>Age</b>                                 | Median (range): Age (Median) Control 62.3; Disulfiram 60.4 |                |                   |
| <b>Number of prior systemic therapies</b>  | Median (range): 0                                          |                |                   |
| <b>Performance Status:</b>                 | ECOG<br>0 —<br>1 —<br>2 —<br>3 —<br>unknown —              |                |                   |
| <b>Other: Number of Subjects by Visit</b>  |                                                            | <b>Control</b> | <b>Disulfiram</b> |
|                                            | Screening                                                  | 27             | 26                |
|                                            | Cycle 1 day 8                                              | 25             | 24                |
|                                            | Cycle 2 day 1                                              | 23             | 23                |
|                                            | Cycle 3 day 1                                              | 19             | 21                |
|                                            | Cycle 4 day 1                                              | 19             | 19                |
|                                            | Cycle 5 day 1                                              | 17             | 16                |
|                                            | Cycle 6 day 1                                              | 15             | 15                |
| <b>Cancer Types or Histologic Subtypes</b> | Non-small cell lung cancer<br>ECOG 0–1                     |                |                   |

## Primary Assessment Method

### Control Arm: Non-small cell lung cancer

|                                           |            |
|-------------------------------------------|------------|
| Number of patients screened               | 27         |
| Number of patients enrolled               | 19         |
| Number of patients evaluable for toxicity | 19         |
| Number of patients evaluated for efficacy | 19         |
| Evaluation method                         | Other      |
| Response assessment CR                    | 0          |
| Response assessment PR                    | 36.8       |
| Response assessment SD                    | 47.4       |
| Response assessment PD                    | 15.4       |
| (Median) duration assessments PFS         | 4.9 months |
| (Median) duration assessments TTP         | 4.9 months |
| (Median) duration assessments OS          | 7.1 months |

### Experimental Arm: Non-small cell lung cancer

|                                           |             |
|-------------------------------------------|-------------|
| Number of patients screened               | 26          |
| Number of patients enrolled               | 21          |
| Number of patients evaluable for toxicity | 21          |
| Number of patients evaluated for efficacy | 21          |
| Evaluation method                         | Other       |
| Response assessment CR                    | 4.8         |
| Response assessment PR                    | 42.9        |
| Response assessment SD                    | 52.4        |
| Response assessment PD                    | 0           |
| (Median) duration assessments PFS         | 5.9 months  |
| (Median) duration assessments TTP         | 6.7 months  |
| (Median) duration assessments OS          | 10.0 months |

## Adverse Events Control Arm

### Adverse Events At All Dose Levels, Cycle 1

| Name                                  | *NC/NA | 1     | 2      | 3     | 4     | 5    | All Grades |
|---------------------------------------|--------|-------|--------|-------|-------|------|------------|
| Cardiac ischemia/infarction           | 96.15% | 0.0%  | 0.0%   | 0.0%  | 3.85% | 0.0% | 3.0%       |
| Neutrophils/granulocytes (ANC/AGC)    | 96.15% | 3.85% | 0.0%   | 0.0%  | 0.0%  | 0.0% | 3.0%       |
| Nausea                                | 69.23% | 7.69% | 19.23% | 3.85% | 0.0%  | 0.0% | 30.0%      |
| Fatigue (asthenia, lethargy, malaise) | 92.31% | 3.85% | 3.85%  | 0.0%  | 0.0%  | 0.0% | 7.0%       |

#### Adverse Events Legend

\*No Change from Baseline/No Adverse Event

The study used relatively high-dose cisplatin and vinorelbine. It was performed before aprepitant and/or palonosetron were available; hence, it is not surprising that high percentages of vomiting and nausea were noted.

It seems that side effects were relatively very similar in the control and the experimental groups.

There were 22 of 27 adverse events in the active and 21 of 26 in the control groups.

Patients generally refrained from drinking alcohol during this trial, and there were no serious events noted as "Antabuse syndrome." There were two cases of myocardial infarction: one in the control group and one in the experimental group, both in the first cycle. In fact, all the serious adverse events happened in the first two cycles and were similar between control and experimental groups. We have not included those patients in the efficacy analysis.

It is also noteworthy that quality of life questionnaires revealed a slight increase in QOL in the experimental versus control group.

## Serious Adverse Events Control Arm

| Name                  | Grade | Attribution |
|-----------------------|-------|-------------|
| Myocardial infarction | 4     | Possible    |

Serious Adverse Events Legend  
Altogether in the first cycle there were 9 serious adverse events noted in the experimental group with 6 of those removed from the study and 8 adverse events in the control group with 7 of those removed from further study.  
Two patients in the experimental group and one in the control group died in the first cycle.

## Assessment, Analysis, and Discussion

|                                     |                                      |
|-------------------------------------|--------------------------------------|
| Completion                          | Study completed                      |
| Pharmacokinetics / Pharmacodynamics | Not collected                        |
| Investigator's Assessment           | Active and should be pursued further |

### Discussion

In this phase IIb trial, we used a combination of disulfiram and a well-described cisplatin-based doublet of cisplatin and vinorelbine. This treatment was one of the most commonly used at the time, and we added disulfiram mainly because of our knowledge of its antiangiogenic activity. It is noteworthy that even now, with the addition of pemetrexed or bevacizumab to our anticancer arsenal, the improvement in overall patient survival was only incremental at ~10 weeks. Both of these drugs are still very expensive, thus the results from the current trial may still be relevant, even with the addition of new anti-lung cancer drugs.

Both overall and progression-free survival curves in the trial separated after a few months. It seemed that many of the patients progressed rapidly without any significant response to the chemotherapy or its combination with disulfiram. However, the separation of the curves after a few months and the relatively long survival of a few patients in the experimental arm suggest that a subpopulation of cancer patients might have greater sensitivity to the addition of disulfiram. The very long survival of two of these patients might be just a chance occurrence but is still intriguing.

An interesting hypothesis is that the addition of disulfiram helps in depletion of the so-called cancer stem cell population. Disulfiram is an inexpensive and well-tolerated compound that has been used widely for alcohol aversion therapy. A larger relatively simple phase III trial adding disulfiram to current platinum-based therapies in lung cancer may have merit. Such a trial, hopefully, could be carried out at a relatively low cost without any special infrastructure in countries that currently do not use bevacizumab or pemetrexed as standard therapy.

Another very interesting avenue of research that could be pursued in a much smaller but more technically demanding trial is a study of the *in vivo* effects of disulfiram on the so-called cancer stem cell population. This could be performed in the neoadjuvant setting by assessing the percentages of cancer stem cells with and without disulfiram before and after therapy. Such a trial could provide important insights into the mechanism of disulfiram activity.

### Acknowledgment

The trial was initiated and supported by Ora Bio Ltd., a small start-up company that is no longer in operation.

### References

1. Barth KS, Malcolm RJ. Disulfiram: An old therapeutic with new applications. *CNS Neurol Disord Drug Targets* 2010;9:5–12.
2. Cvek B. Nonprofit drugs as the salvation of the world's healthcare systems: The case of Antabuse (disulfiram). *Drug Discov Today* 2012;17:409–412.
3. Marikovsky M, Nevo N, Vadai E et al. Cu/Zn superoxide dismutase plays a role in angiogenesis. *Int J Cancer* 2002;97:34–41.
4. O'Flaherty JD, Barr M, Fennell D et al. The cancer stem-cell hypothesis: Its emerging role in lung cancer biology and its relevance for future therapy. *J Thorac Oncol* 2012;7:1880–1890.
5. Kim SK, Kim H, Lee DH et al. Reversing the intractable nature of pancreatic cancer by selectively targeting ALDH-high, therapy-resistant cancer cells. *PLoS One* 2013;8:e78130.

## Figures and Tables

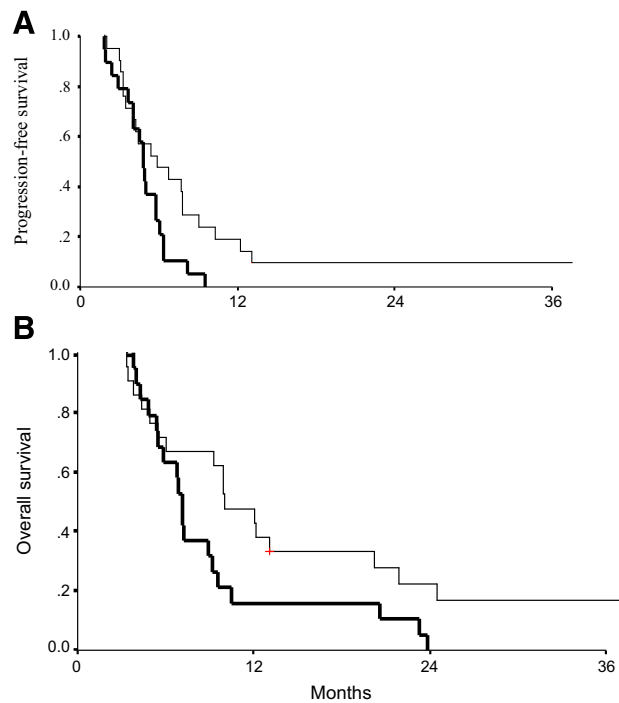

**Figure 1.** Progression-free survival (5.9 vs. 4.9 months;  $p = .043$ ) **(A)** and overall survival (10.0 vs. 7.1 months;  $p = .041$ ) **(B)** of patients in this phase II trial. Controls were treated with six cycles of cisplatin and vinorelbine (plus placebo tablets), and experimental groups were treated with the same treatment plus the addition of disulfiram, which was continued for stable or responding patients. Improvement in both progression-free and overall survival seems to have happened only after a few months.

[Click here](#) to access other published clinical trials.

---
